# Supplementary material for: Microplastics and nanoplastics in the marine-atmosphere environment
Source: Springer Nature journal article supplement (doi:10.1038/s43017-022-00292-x), 2022-05-10
Supplement: 43017_2022_292_MOESM1_ESM.pdf [file 43017_2022_292_MOESM1_ESM.pdf]

---

**Supplementary information**

---

**Microplastics and nanoplastics in the  
marine-atmosphere environment**

---

In the format provided by the  
authors and unedited

## **Title: The Atmospheric Cycle of Microplastics in the Marine Environment**

Supplementary Note 1: The importance of atmospheric micro(nano)plastic transport to remote and polar regions

Supplementary Note 2: Atmospheric microplastics and climate change

Supplementary Note 3: CAM model global deposition and the global monitoring network

Supplementary Note 4: Marine atmospheric sampling platforms

Supplementary Table 1: Tabulated summary of sampling platforms and the advantages and disadvantages of their use in atmospheric micro(nano)plastic studies

1 **Supplementary Note 1: The importance of atmospheric micro(nano)plastic**  
2 **transport to remote and polar regions**

3  
4 The remote and polar regions are natural reserve areas relatively untouched by human  
5 activity. They provide the last bastions of natural ecosystems and biodiversity. If  
6 human activities and resource exploitation results in catastrophic ecosystem collapse  
7 and biodiversity loss, these natural reserve areas provide the potential for future  
8 natural regeneration.

9  
10 It is possible the microplastic and nanoplastic are not transported solely by either  
11 atmospheric transport or aquatic (ocean) transport to these remote areas and poles.  
12 Plastic particles may undergo re-entrainment multiple times in terrestrial and marine  
13 environments, resulting in long-distance transport via a cyclic entrainment-deposition-  
14 re-entrainment process. This may allow for plastic pollution to reach areas that do not  
15 have air or ocean currents feeding directly into them from polluted areas.

16  
17 There is significant evidence of microplastic in the Arctic and Antarctic seas,  
18 suggesting that oceanic currents are one key source of Arctic plastic pollution<sup>1,2</sup> in the  
19 polar marine environment. However, while polar ice acts as a sponge, collecting  
20 marine plastic during its ice formation<sup>3,4</sup>, the microplastic found on the surface of ice  
21 flows and snow are not directly attributable to marine conveyance. Notable  
22 microplastic quantities have been found on Arctic surfaces<sup>5</sup>, and early studies have  
23 identified microplastic in the Antarctic atmosphere. It is suggested that these particles  
24 were either transported long-distance through the atmosphere prior to polar  
25 deposition, or were conveyed via marine currents then emitted during ocean  
26 turbulence (e.g. through the bubble burst ejection process) and atmospherically  
27 transported to the polar surface (land, glaciers or sea ice). Characterising and  
28 quantifying the atmospheric transport contribution to remote area and polar  
29 micro(nano)plastic is therefore necessary to both understand the remote areas  
30 transport processes and to model plastic pollution influx (and future scenarios) to these  
31 relatively pristine and remote locations.

32  
33 **Supplementary Note 2: Atmospheric microplastics and climate change**

34  
35 Research on micro(nano)plastic in the context of climate change is extremely limited  
36 to date. Life cycle and greenhouse gas (GHG) emission analyses show  
37 micro(nano)plastic to contribute to GHG, climate change/global warming potential and  
38 photochemical ozone formation/ozone formation<sup>6,7</sup>. Micro(nano)plastic lost to the  
39 environment release GHG and interfere with ocean carbon fixation. Early model  
40 estimations suggest current GHG from plastic from cradle to grave (incorporating  
41 material extraction, production, manufacture, transport and waste management) of  
42 1.34 gigatons CO<sub>2</sub> equivalent year<sup>-1</sup> by 2030, and by 2050 may consume 10-13% of  
43 the remaining carbon budget<sup>7</sup>.

44  
45 It has been hypothesised that deposition of brake wear and tyre wear particles on ice  
46 and snow may accelerate warming of the cryosphere<sup>8</sup>. Micro(nano)plastic particles,  
47 particularly black coloured particles, may function as cryoconites, increasing the snow  
48 and ice melt in polar and high elevation locations. Given their hydrophobic nature,  
49 microplastic and nanoplastic may act as cloud ice nuclei<sup>9</sup>. Certain regions may  
50 therefore be particularly sensitive to the presence of airborne micro(nano)plastic, such

51 as the Southern Ocean, where cloud albedo is strongly linked to the concentration of  
52 ice-nucleating particles<sup>10</sup>. Southern high latitudes have experienced enhanced UV  
53 fluxes in recent decades owing to the Antarctic ozone hole; this is thought to enhance  
54 the formation of micro(nano)plastics in surface waters and terrestrial environments at  
55 southern high latitudes<sup>11</sup>.

56  
57 Airborne particulate matter influences surface climate by absorbing and scattering  
58 solar and terrestrial radiation. While total aerosol number concentrations range  
59 between  $1 \times 10^9 - 1 \times 10^{10}$  per  $m^3$  over Europe and East Asia<sup>12</sup>, the concentrations of  
60 airborne micro(nano)plastics in the same regions are much lower; between 0.01 –  
61 5000  $MP\ m^{-3}$ .<sup>13,14</sup> Airborne microplastics therefore make only a small contribution to  
62 total aerosol abundances in the present-day atmosphere. Electromagnetic scattering  
63 and absorption calculations indicate that non-pigmented microplastics are efficient at  
64 scattering solar (shortwave) radiation, and at absorbing terrestrial (longwave)  
65 radiation<sup>15</sup>. Global climate model simulations show that the balance between  
66 shortwave effects (which imply a cooling influence on Earth's surface) and longwave  
67 effects (i.e., the greenhouse effect) depends strongly on the assumed vertical  
68 distribution of airborne microplastics<sup>15</sup>. The effective radiative forcing (ERF), assuming  
69 direct aerosol-radiation interactions only (that is, neglecting aerosol-cloud interactions)  
70 is calculated to be on the order of  $-0.746 - 0.044\ mW\ m^{-2}$  assuming a surface  
71 concentration of  $1\ MP\ m^{-3}$ . Compared with the total aerosol effective radiative forcing  
72 of  $-0.71$  to  $-0.14\ W\ m^{-2}$  due to aerosol-radiation interactions<sup>16</sup>, the microplastic ERF is  
73 small in the present-day atmosphere.

74  
75 The expected increase in atmospheric micro(nano)plastic abundances due to  
76 increasing global plastic use and mismanaged plastic waste will increase microplastic  
77 ERF in future, and may influence local and regional climate in regions where airborne  
78 micro(nano)plastic concentrations are particularly large. Furthermore, emissions of  
79 anthropogenic aerosols are projected to decrease in future, which is linked to expected  
80 improvements in air quality<sup>17</sup>. Micro(nano)plastics will therefore make a larger relative  
81 contribution to total aerosol ERF in future.

### 82 83 **Supplementary Note 3: CAM model global gross microplastic deposition and the** 84 **global monitoring network**

85  
86 The Community Atmospheric Model (CAM) model has been used to estimate gross  
87 microplastic deposition across the globe<sup>18</sup>. The results presented in Figure C3.1  
88 highlight the high deposition of atmospheric microplastic across both northern and  
89 southern hemisphere oceans (especially over the Pacific and Mediterranean  
90 Oceans)<sup>18</sup> as well as key terrestrial deposition areas in Europe, China, India, the  
91 middle east, central and northern Africa eastern south America and the USA. The CAM  
92 model results provided an interesting backdrop to the marine microplastic flux  
93 question, providing an early insight into the gross deposition over the marine  
94 environment (microplastic atmospherically transport from the terrestrial environment  
95 as well as marine (secondary) sourced microplastic emission and (re)deposition.  
96 These early global atmospheric microplastic model findings are important as it is the  
97 first tentative assessment of total atmospheric microplastic transport, considering all  
98 plastic polymer types and incorporating marine microplastic atmospheric emission.

99

100 The results of the CAM model are notably different from those presented for  
 101 FLEXPART modelled tyre and brake wear global *net* deposition<sup>8</sup>. This is partly due to  
 102 the inclusion of marine emission in the CAM model whereas Figure 4 **Error! Reference**  
 103 **source not found**. FLEXPART models net deposition to the marine environment (no  
 104 marine emission) therefore providing an insight into the terrestrial net influx of  
 105 microplastic to the marine environment. The microplastic particle size included in the  
 106 CAM model also differs from that used in the FLEXPART model, with the CAM model  
 107 particle size extending from 250µm to 4µm while the FLEXPART model considered  
 108 particles of either <10µm or <2.5µm (PM10 or PM2.5). As presented Figure C3.1 the  
 109 quantity of microplastic particles increases significantly with decreasing particle size.  
 110 Thus the FLEXPART model may incorporate a significantly greater number and mass  
 111 of smaller, more easily atmospherically transported microplastic particles than the  
 112 CAM model. It is also important to note the CAM model adopts a global road  
 113 microplastic emission rate (all polymers in road dust, not just tyre and brake wear) of  
 114 96Mt/yr rather than the 284MT yr<sup>-1</sup> used in the FLEXPART model<sup>18</sup>. These highlighted  
 115 differences illustrate the need for better harmonization and compatible  
 116 parameterisation and field work to characterise atmospheric micro(nano)plastic  
 117 particles and transport dynamics to enable advancement of atmospheric  
 118 micro(nano)plastic modelling.

119  
 120 The proposed GAW/WMO long-term monitoring stations have been overlaid onto the  
 121 global *gross* atmospheric microplastic deposition results from the CAM model analysis  
 122 to illustrate that the proposed stations incorporate locations appropriate to analyse  
 123 marine microplastic (re)emission and recycling as well as net marine microplastic  
 124 deposition. The proposed GAW/WMO sampling sites extend onto high marine  
 125 atmospheric microplastic gross deposition areas of the Atlantic, Mediterranean and  
 126 Pacific as well as the low deposition zones of the Arctic and Antarctic. The proposed  
 127 fixed platform network would therefore be effective in providing both an understanding  
 128 of net marine micro(nano)plastic deposition and gross marine micro(nano)plastic  
 129 cycling, advancing the early estimation of the terrestrially sourced atmospheric  
 130 micro(nano)plastic flux to the marine environment and quantification of the marine  
 131 atmospheric micro(nano)plastic cycle.

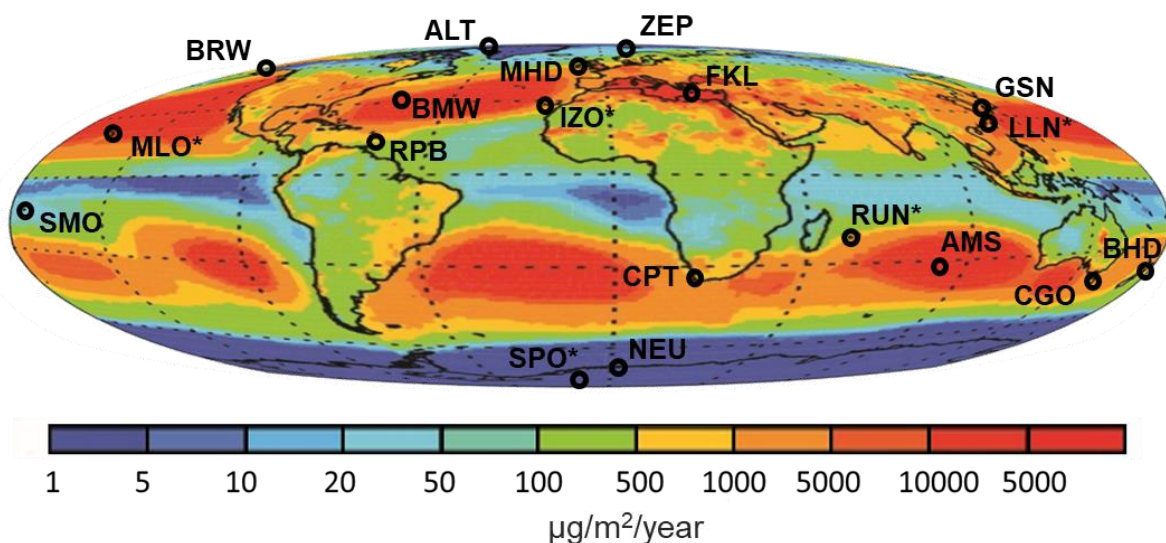

132  
 133 Supplementary Figure 3 Possible sampling sites illustrated on maps of CAM modelling of the total  
 134 atmospheric microplastic deposition (all polymer types)<sup>18</sup>. Locations identified with \* are high altitude

135 (tropospheric) sites, all other locations are coastal monitoring sites. Sites are as follows: ALT Alert  
136 (Canada); AMS Amsterdam Island (France); BHD Baring Head (NZ); BMW Tudor Hill (Bermuda); BRW  
137 (Barrow, USA); CGO Cape Grim (Australia); CPT Cape Point (South Africa); FKL Finokalia (Greece);  
138 GSN Gosan (Korea); IZO Izana (Spain, 2373 m); LLN Lulin (Taiwan, China 2862 m); MHD Mace Head  
139 (Ireland); MLO Mauna Loa (USA, 3397 m); NEU Neumayer (Antarctica); RPB Ragged Point (Barbados);  
140 RUN La Reunion (France, 2160m); SMO American Samoa (USA); SPO South Pole (Antarctica, 2841  
141 m); ZEP Zeppelin (Norway).

142

## 143 **Supplementary Note 4: Marine atmospheric sampling platforms**

144

### 145 Marine Research Vessels

146 Ships provide access to regions of the ocean that are otherwise inaccessible,  
147 functioning with a typical campaign of 20-40 days. While ship-based research  
148 (primarily research vessels) can provide sampling from currently unmonitored marine  
149 atmospheric locations, the individual voyages result in a dataset that may be spatially  
150 and temporally patchy<sup>19</sup> and therefore climatologically less representative. Longer-  
151 term monitoring research campaigns such as GEOTRACES<sup>20</sup>, the Atlantic Meridional  
152 Transect Programme<sup>21</sup> and Alfred Wegener Institute ship-based research program  
153 (e.g. RV *Polarstern* research campaigns)<sup>22</sup> can however provide vital offshore marine  
154 atmospheric information and be a valuable monitoring platform when employed multi-  
155 annually (potentially also seasonally) over a specific transect. To date only pumped  
156 aerosol samplers have been used on vessels, providing data of atmospheric  
157 composition (only three marine cruises have sampled and published marine  
158 atmospheric microplastic to date (Figure 2, Figure C4.1) across the Atlantic, Pacific  
159 Antarctic and Arctic oceans primarily<sup>13,23,24</sup>. In general, rainfall and dry deposition is  
160 grossly under-sampled over the oceans considering its importance to the air-to-sea  
161 transfer of material to the global ocean, with no precipitation or dry deposition yet  
162 undertaken specifically for micro(nano)plastic analysis.

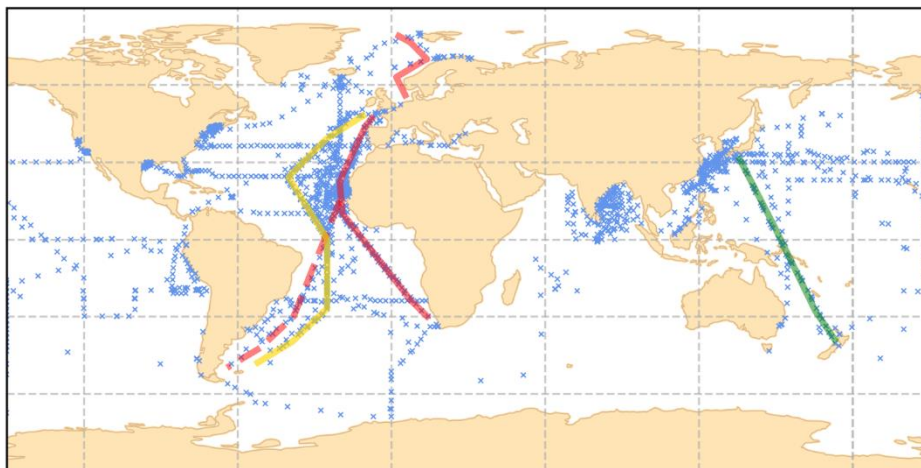

163

164 Supplementary Figure 4. Locations of aerosol samples collected from UK, French, German, Dutch, New  
165 Zealand, Australian and Japanese ships and analysed at UEA from 2000 to 2019 (n = ~2070) (blue)<sup>19</sup>.  
166 Atlantic Meridional Transect cruises are shown in yellow, *Polarstern* inter-hemisphere transfers and  
167 Arctic campaigns in red and *Transfuture5* voyages in green.

168

169 To advance marine shipping research programmes, it is recommended both  
170 atmospheric deposition and air concentration (pumped air sampling) be undertaken  
171 on research cruises, and that these cruises occur across the range of seasonal  
172 conditions and over multiple years (long-term monitoring). This would result in  
173 illustration of seasonal and annual trends in marine atmospheric micro(nano)plastic

174 composition and provide information of the deposition rate of atmospheric  
175 micro(nano)plastic to the ocean. With quantitatively characterised marine atmospheric  
176 micro(nano)plastic deposition information, back trajectory location specific models can  
177 identify the potential marine or terrestrial source of these particles, improving the early  
178 estimations of marine atmospheric micro(nano)plastic flux. Once a substantive marine  
179 atmospheric MP database is available, global flux modelling (such as undertaken by  
180 Brahney et al. and Evangeliou et al.<sup>8,18</sup>) to quantify the overall marine atmospheric  
181 micro(nano)plastic flux can be executed with greater accuracy (both terrestrial  
182 provisioning of micro(nano)plastic to the oceans and marine micro(nano)plastic  
183 contribution to the terrestrial atmospheric micro(nano)plastic burden). Furthermore,  
184 vessels transects can be designed to follow major continental outflows to examine the  
185 trend in micro(nano)plastic atmospheric transport along established meteorological  
186 conveyance pathways. Such micro(nano)plastic specific vessel based sampling help  
187 document gradients in continental-sourced micro(nano)plastic concentrations and  
188 potentially opposing gradients in sea surface microlayer sourced micro(nano)plastic,  
189 demonstrating the spatial atmospheric micro(nano)plastic burden and influence of  
190 terrestrial or offshore marine conditions.

191

#### 192 Fixed coastal or island platforms

193 Two notable fixed platform networks have been used to analyse the continental  
194 aerosol contribution to the marine environment over the past four decades. The  
195 SEAREX Ocean Aerosol Sampling Network was designed to characterise marine  
196 atmospheric chemistry and the role of continental to marine (ocean) transport within  
197 the (western) Pacific Ocean<sup>25</sup>. The AEROCE Network (interlinked with several World  
198 Meteorological Organisation observatories and Global Atmosphere Watch  
199 Programme(GAW)) undertook similar research extending along the east and west of  
200 the central to north Atlantic Ocean. The SEAREX and AEROCE networks used 17-  
201 20m walk-up scaffold sampling towers equipped with elevated atmospheric samplers  
202 supported by temporary or permanent field laboratories located on both continental  
203 coast and islands at the terrestrial-marine interface. Long-term monitoring occurred,  
204 including year-round measurements linked to the specific synoptic meteorological  
205 conditions, in conjunction with short-term intensive research activities that addressed  
206 focused research questions (e.g. sea salt aerosol bubble burst emission  
207 quantification).

208

209 The SEAREX and AEROCE networks long-term monitoring has paved the way for  
210 marine atmospheric science breakthroughs over the past four decades<sup>26–29</sup>. The  
211 sampling strategy and network design was shown to be effective in capturing the  
212 continental atmospheric contribution and influence to the marine environment and  
213 helped to establish protocols and field campaign design for global marine atmospheric  
214 monitoring strategies. During the SEAREX and AEROCE long-term monitoring  
215 campaigns key results illustrated the needs for meteorological consideration in the  
216 efforts to minimise sample contamination, the island effect (especially on condensation  
217 nuclei concentrations) and the importance of sampling times steps of <24 hours to  
218 ensure synoptic situations to be attributed to individual samples and back-trajectory  
219 analysis can be undertaken with greater certainty. The SEAREX and AEROCE  
220 networks provide a proven global network strategy that could be effectively utilised to  
221 collect representative samples and undertake analyse consistent and comparable  
222 analysis of global marine atmospheric micro(nano)plastic.

223

224

## 225 Aircraft, UAV, buoys

226 Manned aircraft have been used to collect atmospheric samples for short term or snap  
227 shot monitoring of atmospheric composition<sup>30–32</sup>. Recently, one campaign has used  
228 manned aircraft to sample for micro(nano)plastic (over a populated terrestrial area)<sup>33</sup>.  
229 Manned aircraft can provide access to spatial locations and elevations which are  
230 difficult to reach, operating at a variety of altitudes (PBL, troposphere and  
231 stratosphere) over terrestrial or marine environments. Similar to constraints identified  
232 with ship sampling, manned aircraft sampling occurs over a spatial extent rather than  
233 single location and has campaign duration constraints (limited by flight times).  
234 Furthermore, micro(nano)plastic (specifically environmentally weathered and  
235 degraded particles) are very fragile and shatter under notable impact (such as  
236 sampling at high wind speeds or at significant velocity). Therefore, significant further  
237 research is necessary to quantify the efficiency of traditional research aircraft for  
238 atmospheric micro(nano)plastic sampling. Studies are needed to ensure particle  
239 integrity is retained and to quantify the micro(nano)plastic loss due to filter inlet  
240 pressure (preventing particles from entering the sampling chamber due to aircraft  
241 speed and inlet design) and by/through pass (particles by-passing or being sucked  
242 through the filter due to pressure differential or excessive vacuum).

243

244 Unmanned aircraft systems (UAVs) have recently emerged as an effective low altitude  
245 (PBL, troposphere) sampling platforms<sup>34–36</sup>. While UAVs have not yet been used to  
246 sample atmospheric MP, their low airspeed coupled with elevation range and access  
247 to remote or difficult to sample locations suggests they may be an effective platform  
248 for atmospheric micro(nano)plastic sampling. The low operational cost and easy  
249 availability of UAV make them very attractive. Significant recent advances allow for a  
250 complete automatic flight from launch to landing following a predetermined flight path.  
251 However, these UAV have payload and/or duration limitations, requiring sampling  
252 equipment to be minimalist (and battery powered active sampling is required). There  
253 are also spatial and elevation limitations as under air law in most countries, the UAV  
254 must stay within visual line of sight (VLOS) and have an altitude restriction of 400 feet  
255 above ground level (~120m). These restrictions can be overcome under special  
256 permits requiring substantial investment in both equipment and training. Larger long  
257 range UAV such as the Global Hawk UAV, one of the largest available, has a 680kg  
258 payload, an 8500 nautical-mile range and a 24-hour endurance. Unfortunately, this  
259 aircrafts cruising speed is of a similar nature to the standard research aircraft.

260

261 Fixed wing and vertical take-off and landing (VTOL) fixed wing, a more commonly  
262 available UAV, can have a 5kg payload, 100km flight range (within VLOS) and 5-hour  
263 endurance. These may create opportunities for micro(nano)plastic research due to  
264 their ability to fly very close to potential sources in complete safety whilst staying within  
265 aircraft regulations. Many heavy lift multirotor UAV are available with up to 20kg  
266 payload, however very few have a longer than 20 min flight duration severely limiting  
267 their applicability to micro(nano)plastic research due to small sample size. For coastal  
268 operations, low elevations and remote locations (marine launched UAVs) UAVs could  
269 provide an effective sampling platform for marine and terrestrial atmospheric MP.

270

271 Buoys have been successfully used for marine atmospheric sampling, monitoring dust  
272 and atmospheric composition in static marine locations at low (near sea surface)  
273 elevations<sup>37</sup>. Buoys may provide a complementary long-term static marine sampling



274 network complementary to fixed platforms and shipping vessel sampling, providing  
 275 near surface air concentration or depositional data. Power supply on buoys can be  
 276 limited, constraining sampling methodology to passive or low power consumption  
 277 activities. Sample collection via buoys includes complexity due to their isolation  
 278 (accessing buoy samples by ship may be difficult at regular intervals) resulting in  
 279 potentially irregular sampling times and longer sample durations. Despite these  
 280 limitations, use of buoys to undertake specific research intensive field assessment  
 281 may be effective where low elevation sampling is required, and buoys may form part  
 282 of a long-term monitoring network when combined with other global initiatives.

283

284 **Supplementary Table 1. Tabulated summary of sampling platforms and the**  
 285 **advantages and disadvantages of their use in atmospheric micro(nano)plastic**  
 286 **studies**

287

| Platform Type                                                 | Advantages                                                                                                                                                                                                                                                                                                                                                                  | Disadvantages                                                                                                                                                                                                                              |
|---------------------------------------------------------------|-----------------------------------------------------------------------------------------------------------------------------------------------------------------------------------------------------------------------------------------------------------------------------------------------------------------------------------------------------------------------------|--------------------------------------------------------------------------------------------------------------------------------------------------------------------------------------------------------------------------------------------|
| <u>Ships</u>                                                  | <ul style="list-style-type: none"> <li>• Unlimited marine locations</li> <li>• Can have trained personnel and appropriate technical capacity (i.e. clean labs)</li> <li>• Potential of ocean-atmosphere exchange sampling</li> <li>• Long-term monitoring through repeated visitation of selected offshore stations over multiple years (e.g. GEOTRACES program)</li> </ul> | <ul style="list-style-type: none"> <li>• Short-term (days or weeks to several months) temporal snapshots</li> <li>• Very dirty environment</li> <li>• May travel at speeds resulting in spatially ranging sample representation</li> </ul> |
| <u>Sailing vessels</u>                                        | <ul style="list-style-type: none"> <li>• Unlimited marine locations</li> <li>• Can accommodate trained personnel</li> <li>• Functional in mild to moderate weather conditions</li> <li>• Slow passage speed supporting effective spatial sampling</li> <li>• Potential for ocean-atmosphere exchange sampling</li> <li>• Relatively low cost</li> </ul>                     | <ul style="list-style-type: none"> <li>• Short to moderate temporal snapshots</li> <li>• Fewer personnel accommodated than ships</li> <li>• Limited on-board analysis</li> </ul>                                                           |
| <u>Island/coastal sites</u><br><i>WMO/GAW permanent sites</i> | <ul style="list-style-type: none"> <li>• Synoptic, seasonal and annual variability</li> <li>• Trained personnel</li> <li>• Supporting chemical/meteorological measurements</li> <li>• Multiple elevations</li> </ul>                                                                                                                                                        | <ul style="list-style-type: none"> <li>• Limited geographical locations</li> </ul>                                                                                                                                                         |
| <u>Island/coastal sites</u><br><i>Other permanent sites</i>   | <ul style="list-style-type: none"> <li>• Synoptic, seasonal and annual variability</li> <li>• Possible supporting chemical/meteorological measurements</li> </ul>                                                                                                                                                                                                           | <ul style="list-style-type: none"> <li>• Limited trained personnel</li> <li>• Limited geographical locations</li> </ul>                                                                                                                    |
| <u>Island/coastal sites</u><br><i>Non-permanent sites</i>     | <ul style="list-style-type: none"> <li>• Synoptic and possibly seasonal scale variability</li> <li>• Possible supporting chemical/meteorological</li> </ul>                                                                                                                                                                                                                 | <ul style="list-style-type: none"> <li>• Limited/untrained personnel</li> <li>• Limited geographical locations</li> </ul>                                                                                                                  |

|                                                 |                                                                                                                                                                                               |                                                                                                                                                                                                                                                                                                       |
|-------------------------------------------------|-----------------------------------------------------------------------------------------------------------------------------------------------------------------------------------------------|-------------------------------------------------------------------------------------------------------------------------------------------------------------------------------------------------------------------------------------------------------------------------------------------------------|
|                                                 | measurements (in some cases)                                                                                                                                                                  |                                                                                                                                                                                                                                                                                                       |
| <u>Aircraft</u>                                 | <ul style="list-style-type: none"> <li>• Unlimited marine locations</li> <li>• Trained personnel</li> <li>• Multiple elevations</li> </ul>                                                    | <ul style="list-style-type: none"> <li>• Very short-term temporal snapshots</li> <li>• Limited sampling intervals</li> <li>• Very expensive</li> </ul>                                                                                                                                                |
| <u>Drones &amp; UAVs</u>                        | <ul style="list-style-type: none"> <li>• Multiple elevations</li> <li>• Relatively Low cost</li> </ul>                                                                                        | <ul style="list-style-type: none"> <li>• Limited marine locations unless launched from ships</li> <li>• Very short-term temporal snapshots</li> <li>• Limited sampling intervals</li> <li>• Limited power availability and payload</li> </ul>                                                         |
| <u>Tethered or remotely controlled balloons</u> | <ul style="list-style-type: none"> <li>• Full range of elevation (surface-PBL-troposphere)</li> <li>• Generally limited to terrestrial release but potentially possible from ships</li> </ul> | <ul style="list-style-type: none"> <li>• Limited access due to expense, licensing</li> <li>• Snapshot sampling rather than continuous</li> <li>• Potential for constraints in spatial control</li> <li>• Limited sampling equipment payload (when considering multiple elevation sampling)</li> </ul> |
| <u>Buoys</u>                                    | <ul style="list-style-type: none"> <li>• Synoptic, seasonal and annual variability</li> <li>• Possible wide geographical coverage</li> </ul>                                                  | <ul style="list-style-type: none"> <li>• Difficult to service</li> <li>• Possible limited power</li> <li>• Excessive sea spray</li> </ul>                                                                                                                                                             |

288  
289  
290

## References

- 291 1. Cincinelli, A. *et al.* Microplastic in the surface waters of the Ross Sea  
292 (Antarctica): Occurrence, distribution and characterization by FTIR.  
293 *Chemosphere* **175**, 391–400 (2017).
- 294 2. Tekman, M. B. *et al.* Tying up Loose Ends of Microplastic Pollution in the  
295 Arctic: Distribution from the Sea Surface through the Water Column to Deep-  
296 Sea Sediments at the HAUSGARTEN Observatory. *Environ. Sci. Technol.* **54**,  
297 4079–4090 (2020).
- 298 3. Kelly, A., Lannuzel, D., Rodemann, T., Meiners, K. M. & Auman, H. J.  
299 Microplastic contamination in east Antarctic sea ice. *Mar. Pollut. Bull.* **154**,  
300 111130 (2020).
- 301 4. Peeken, I. *et al.* Arctic sea ice is an important temporal sink and means of  
302 transport for microplastic. *Nat. Commun.* **9**, 1505 (2018).
- 303 5. Bergmann, M. *et al.* White and wonderful? Microplastics prevail in snow from  
304 the Alps to the Arctic. *Sci. Adv.* **5**, eaax1157 (2019).
- 305 6. Vega, G. C., Gross, A. & Birkved, M. The impacts of plastic products on air  
306 pollution - a simulation study for advanced life cycle inventories of plastics  
307 covering secondary microplastic production. *Sustain. Prod. Consum.* **28**, 848–  
308 865 (2021).
- 309 7. Shen, M. *et al.* (Micro)plastic crisis: Un-ignorable contribution to global  
310 greenhouse gas emissions and climate change. *J. Clean. Prod.* **254**, 120138  
311 (2020).

- 312 8. Evangeliou, N. *et al.* Atmospheric transport, a major pathway of microplastics  
313 to remote regions. *Nat. Commun.* **11**, 3381 (2020).
- 314 9. Ganguly, M. & Ariya, P. A. Ice Nucleation of Model Nano-Micro Plastics: A  
315 Novel Synthetic Protocol and the Influence of Particle Capping at Diverse  
316 Atmospheric Environments. *ACS Earth Sp. Chem.* (2019)  
317 doi:10.1021/acsearthspacechem.9b00132.
- 318 10. Vergara-Temprado, J. *et al.* Strong control of Southern Ocean cloud reflectivity  
319 by ice-nucleating particles. *Proc. Natl. Acad. Sci. U. S. A.* **115**, 2687–2692  
320 (2018).
- 321 11. Williamson, C. E. *et al.* The interactive effects of stratospheric ozone depletion,  
322 UV radiation, and climate change on aquatic ecosystems. *Photochem.*  
323 *Photobiol. Sci.* **18**, 717–746 (2019).
- 324 12. Spracklen, D. V. *et al.* Explaining global surface aerosol number  
325 concentrations in terms of primary emissions and particle formation. *Atmos.*  
326 *Chem. Phys.* **10**, 4775–4793 (2010).
- 327 13. Liu, K. *et al.* Consistent transport of terrestrial microplastics to the ocean  
328 through atmosphere. *Environ. Sci. Technol.* **53**, 10612–10619 (2019).
- 329 14. Li, Y. *et al.* Airborne fiber particles: Types, size and concentration observed in  
330 Beijing. *Sci. Total Environ.* **705**, 135967 (2020).
- 331 15. Revell, L., Kuma, P., Ru, E. C. Le, Somerville, W. R. C. & Gaw, S. K. Direct  
332 radiative effects of airborne microplastics. *Nature* **598**, 462–467 (2021).
- 333 16. Bellouin, N. *et al.* Bounding Global Aerosol Radiative Forcing of Climate  
334 Change. *Rev. Geophys.* **58**, 1–45 (2020).
- 335 17. Riahi, K. *et al.* The Shared Socioeconomic Pathways and their energy, land  
336 use, and greenhouse gas emissions implications: An overview. *Glob. Environ.*  
337 *Chang.* **42**, 153–168 (2017).
- 338 18. Brahney, J. *et al.* Constraining the atmospheric limb of the plastic cycle. *PNAS*  
339 **118**, e2020719118 (2021).
- 340 19. Baker, A. R. *et al.* Observation- and Model-Based Estimates of Particulate Dry  
341 Nitrogen Deposition to the Oceans. *Atmos. Chem. Phys.* **17**, 8189–8210  
342 (2017).
- 343 20. He, Y. & Mason, R. P. Comparison of reactive gaseous mercury measured by  
344 KCl-coated denuders and cation exchange membranes during the Pacific  
345 GEOTRACES GP15 expedition. *Atmos. Environ.* **244**, 117973 (2021).
- 346 21. Baker, A. R. & Jickells, T. D. Atmospheric deposition of soluble trace elements  
347 along the Atlantic Meridional Transect (AMT). *Prog. Oceanogr.* **158**, 41–51  
348 (2017).
- 349 22. Kanitz, T., Ansmann, A., Engelmann, R. & Althausen, D. North-south cross  
350 sections of the vertical aerosol distribution over the Atlantic Ocean from  
351 multiwavelength Raman/polarization lidar during Polarstern cruises. *J.*  
352 *Geophys. Res. Atmos.* **118**, 2643–2655 (2013).
- 353 23. Trainic, M. *et al.* Airborne microplastic particles detected in the remote marine  
354 atmosphere. *Commun. Earth Environ.* **1**, 1–9 (2020).
- 355 24. Wang, X. *et al.* Atmospheric microplastic over the South China Sea and East  
356 Indian Ocean : abundance , distribution and source. *J. Hazard. Mater.* **389**,  
357 121846 (2020).
- 358 25. Duce, R. A. SEAREX: the sea/air exchange program. in *Chemical*  
359 *Oceanography* vol. 10 (Academic Press, 1989).
- 360 26. Prospero, J. M., Savoie, D. L. & Duce, R. A. Particulate nitrate and non-sea-  
361 salt sulfate in the boundary layer over the Pacific Ocean. *Atmos. Environ.*

- 362 2074–2075 (1986).
- 363 27. Gagosian, R. B., Peltzer, E. T. & Zafiriou, O. C. Atmospheric transport of  
364 continentally derived lipids to the tropical North Pacific. *Nature* **291**, 312–314  
365 (1981).
- 366 28. Uematsu, M. *et al.* Transport of mineral aerosol from Asia over the North  
367 Pacific ocean. *J. Geophys. Res.* **88**, 5343–5352 (1983).
- 368 29. Uematsu, M., Duce, R. A. & Prospero, J. M. Deposition of atmospheric mineral  
369 particles in the North Pacific Ocean. *J. Atmos. Chem.* **3**, 123–138 (1985).
- 370 30. Smith, D. J. *et al.* Airborne bacteria in earth’s lower stratosphere resemble taxa  
371 detected in the troposphere: Results from a new NASA Aircraft Bioaerosol  
372 Collector (ABC). *Front. Microbiol.* **9**, 1–20 (2018).
- 373 31. Bakwin, P. S. *et al.* Strategies for measurement of atmospheric column means  
374 of carbon dioxide from aircraft using discrete sampling. *J. Geophys. Res.*  
375 *Atmos.* **108**, 1–7 (2003).
- 376 32. Stith, J. L. *et al.* An overview of aircraft observations from the Pacific Dust  
377 Experiment campaign. *J. Geophys. Res. Atmos.* **114**, 1–16 (2009).
- 378 33. González-Pleiter, M. *et al.* Occurrence and transport of microplastics sampled  
379 within and above the planetary boundary layer. *Sci. Total Environ.* **761**,  
380 143213 (2020).
- 381 34. Powers, C. W. *et al.* Coordinated Sampling of microorganisms over freshwater  
382 and saltwater environments using an unmanned surface vehicle (USV) and a  
383 small unmanned aircraft system (sUAS). *Front. Microbiol.* **9**, 1–12 (2018).
- 384 35. Andersen, T., Scheeren, B., Peters, W. & Chen, H. A UAV-based active  
385 AirCore system for measurements of greenhouse gases. *Atmos. Meas. Tech.*  
386 **11**, 2683–2699 (2018).
- 387 36. Chang, C. C. *et al.* An optimized multicopter UAV sounding technique (MUST)  
388 for probing comprehensive atmospheric variables. *Chemosphere* **254**, 126867  
389 (2020).
- 390 37. van der Does, M., Knippertz, P., Zschenderlein, P., Giles Harrison, R. & Stuut,  
391 J.-B. W. The mysterious long-range transport of giant mineral dust particles.  
392 *Sci. Adv.* **4**, (2018).
- 393
